# Supplementary material for: Gas-phase synthesis of morphology-controlled Pt nanoparticles and their impact on cinnamaldehyde hydrogenation
Source: Royal Society of Chemistry journal article supplement (doi:10.1039/c9cy00158a), 2019-01-01
Supplement: c9cy00158a1.pdf [file c9cy00158a1.pdf]

**Electronic supplementary information**

**Gas-Phase Synthesis of Morphology-Controlled Pt Nanoparticles and  
Their Impact on Cinnamaldehyde Hydrogenation**

Sosuke Kato,<sup>a</sup> Junya Ohyama,<sup>b,c\*</sup> Masato Machida,<sup>b,c</sup> and Atsushi Satsuma<sup>a,c\*</sup>

<sup>a</sup>Department of Materials Chemistry, Graduate school of Engineering, Nagoya University, Nagoya, 464-8603, Japan

<sup>b</sup>Faculty of Advanced Science and Technology, Kumamoto University, Kumamoto, 860-8555, Japan

<sup>c</sup>Elements Strategy Initiative for Catalysts and Batteries, Kyoto University, Kyoto, 615-8245, Japan

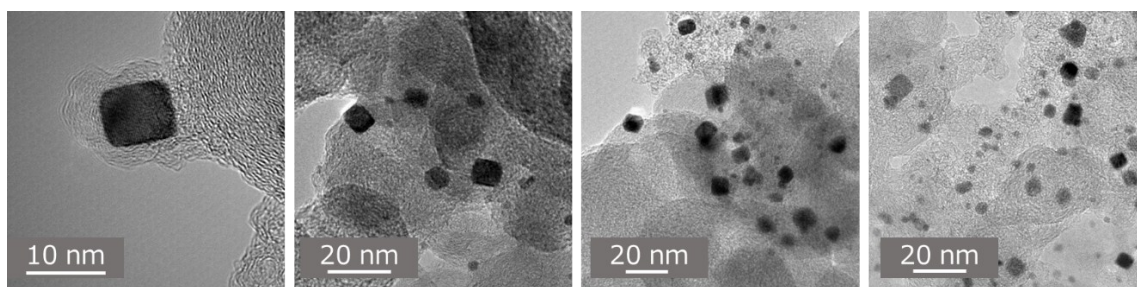

**Figure S1.** TEM images of Pt/C-CO catalysts.

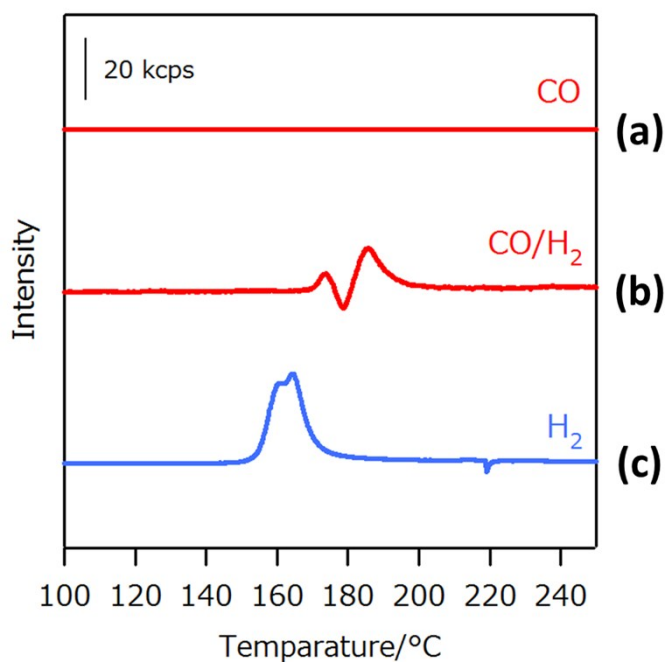

**Figure S2.** Temperature-programmed reduction (TPR) profiles of Pt/C under (a) CO, (b) CO/H<sub>2</sub>, and (c) H<sub>2</sub> flow.

The TPR was carried out using a BEL-CAT-B instrument. Approximately 30 mg was placed in a sample tube. After the samples were pretreated at 50 °C in He, CO/H<sub>2</sub>-TPR measurement was performed under a flow of mixed 5% CO/He and 1% H<sub>2</sub>/Ar at rates of 5 and 50 mL/min; CO-TPR was performed under a flow of 5% CO/He, and H<sub>2</sub>-TPR was performed under a 1% H<sub>2</sub>/Ar flow at a rate of 40 mL/min. The sample temperature was ramped from 50 °C to 500 °C at 5 °C/min.

The CO/H<sub>2</sub>-TPR (b) and H<sub>2</sub>-TPR profiles (c) show peaks due to Pt precursor reduction below 200 °C. However, CO-TPR (a) showed no peaks from 50 °C to 500 °C. The results indicate that CO acts as a protective rather than a reducing agent.

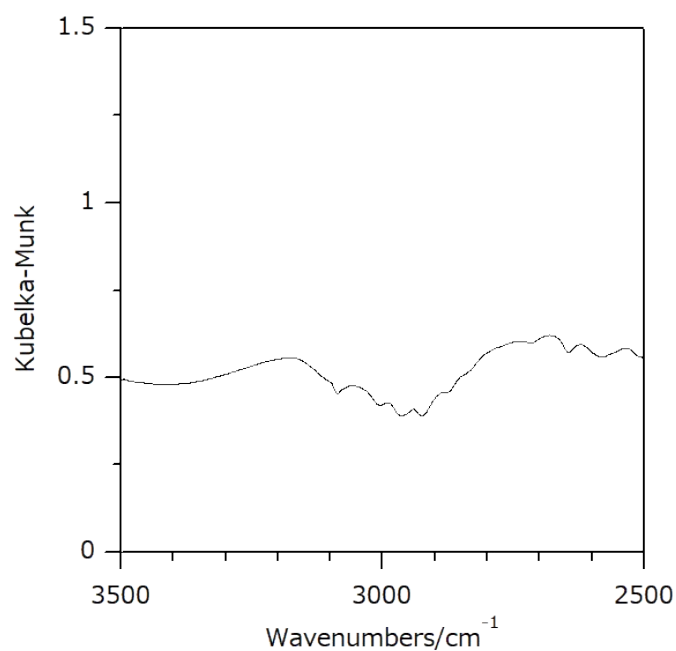

**Fig. S3** In situ IR spectrum of C-H vibration region of 10wt% Pt/SiO<sub>2</sub>-CO after treatment under 2.7% CO/33% H<sub>2</sub>/Ar flow at 200 °C for 1 h. There was no significant peak due to C-H vibration; however, CO vibration was clearly observed as shown in Fig. 4. The result suggests that CO mainly contribute the structural variation of Pt nanoparticles.

**Table S1.** Pt particle size and CAL hydrogenation results<sup>a</sup> for Pt/C catalysts.

| Catalyst                        | Particle size (nm) |                       | XRD crystallite size (nm) | Reaction time (min) | Conversion (%) | Reaction Rate (10 <sup>-5</sup> mol/s/g) | Selectivity (%) |      |      | TOF (/s)     |              |             |
|---------------------------------|--------------------|-----------------------|---------------------------|---------------------|----------------|------------------------------------------|-----------------|------|------|--------------|--------------|-------------|
|                                 | TEM                | CO pulse <sup>b</sup> |                           |                     |                |                                          | COL             | HCAL | HCOL | TEM          | CO pulse     | XRD         |
| 5 wt% Pt/C-CO                   | 5.3 ± 3.9          | 9.3                   | 8.0                       | 20                  | 36.2           | 2.0                                      | 62.4            | 30.9 | 6.7  | 0.39         | 0.66         | 0.60        |
| 10 wt% Pt/C-CO                  | 6.6 ± 3.9          | 16                    | 13                        | 20                  | 28.2           | 1.6 ± 0.33                               | 68.7 ± 4.6      | 27.9 | 3.4  | 0.27 ± 0.06  | 0.63 ± 0.14  | 0.54 ± 0.12 |
| 20 wt% Pt/C-CO                  | 9.9 ± 4.1          | 26                    | 19                        | 15                  | 36.6           | 2.7                                      | 61.1            | 31.9 | 7.0  | 0.33         | 0.84         | 0.99        |
| 5 wt% Pt/C-H <sub>2</sub>       | 2.2 ± 1.0          | 3.7                   | 11                        | 50                  | 28.2           | 0.63                                     | 35.7            | 59.5 | 4.8  | 0.051        | 0.087        | 0.26        |
| 10 wt% Pt/C-H <sub>2</sub>      | 3.9 ± 2.8          | 5.3                   | 17                        | 60                  | 26.3           | 0.49 ± 0.17                              | 32.5 ± 2.3      | 64.6 | 2.9  | 0.039 ± 0.01 | 0.051 ± 0.01 | 0.17 ± 0.01 |
| 20 wt% Pt/C-H <sub>2</sub>      | 4.8 ± 2.8          | 7.0                   | 19                        | 60                  | 35.6           | 0.66                                     | 34.5            | 59.7 | 5.8  | 0.030        | 0.042        | 0.15        |
| 50 wt% Pt/C-H <sub>2</sub>      | 6.9 ± 3.4          | 13                    | 16                        | 20                  | 24.1           | 1.3                                      | 28.9            | 58.0 | 13.1 | 0.033        | 0.069        | 0.078       |
| 10 wt% Pt/C-hCO                 | 6.3 ± 3.3          | 9.9                   | 9.4                       | 15                  | 34.1           | 2.5                                      | 55.0            | 35.6 | 9.4  | 0.30         | 0.48         | 0.45        |
| 10 wt% Pt/C-hCO-500             | 7.4 ± 3.2          | 17                    | 9.9                       | 13                  | 32.7           | 2.8                                      | 63.0            | 31.6 | 5.4  | 0.51         | 1.1          | 0.66        |
| 10 wt% Pt/C-H <sub>2</sub> -500 | 6.0 ± 3.7          | 14                    | 18                        | 60                  | 26.5           | 0.49                                     | 38.4            | 57.2 | 4.4  | 0.054        | 0.12         | 0.16        |

<sup>a</sup> Reaction conditions: catalyst 10 mg : toluene : cinnamaldehyde : o-xylene = 10 : 1 : 1 (mol%), distilled water 0.5 mL, 120 °C, and 1.0 MPa H<sub>2</sub> pressure.

<sup>b</sup> Calculated from Pt dispersion assuming spherical Pt particles.
